# Supplementary material for: Polymorphism and phase transformations of a cocrystal of nicotinamide and pimelic acid
Source: Royal Society of Chemistry journal article supplement (doi:10.1039/c2ce26151k), 2012-01-01
Supplement: c2ce26151k.pdf [file c2ce26151k.pdf]

## **Polymorphism and phase transformations of a cocrystal of nicotinamide and pimelic acid**

Srinivasulu Aitipamula,<sup>\*,a</sup> Annie B. H. Wong,<sup>a</sup> Pui Shan Chow,<sup>a</sup> and Reginald B.H. Tan<sup>\*,a,b</sup>

<sup>a</sup>*Institute of Chemical and Engineering Sciences, A\*STAR (Agency for Science, Technology and Research), 1, Pesek Road, Jurong Island, Singapore, 627833. Tel: (65) 6796 3858, Fax: (65) 6316 6183.*

*Email: srinivasulu\_aitipamula@ices.a-star.edu.sg*

<sup>b</sup>*Department of Chemical & Biomolecular Engineering, National University of Singapore, 4 Engineering Drive 4, Singapore 117576.*

*Email: reginald\_tan@ices.a-star.edu.sg*

### **Electronic Supplementary Information (3 Pages)**

#### **Contents**

- Fig. S1** ORTEP diagrams
- Fig. S2** TGA profiles of Form 1 and Form 2.
- Fig. S3** Comparison of the PXRD patterns of the samples obtained in the grinding experiments

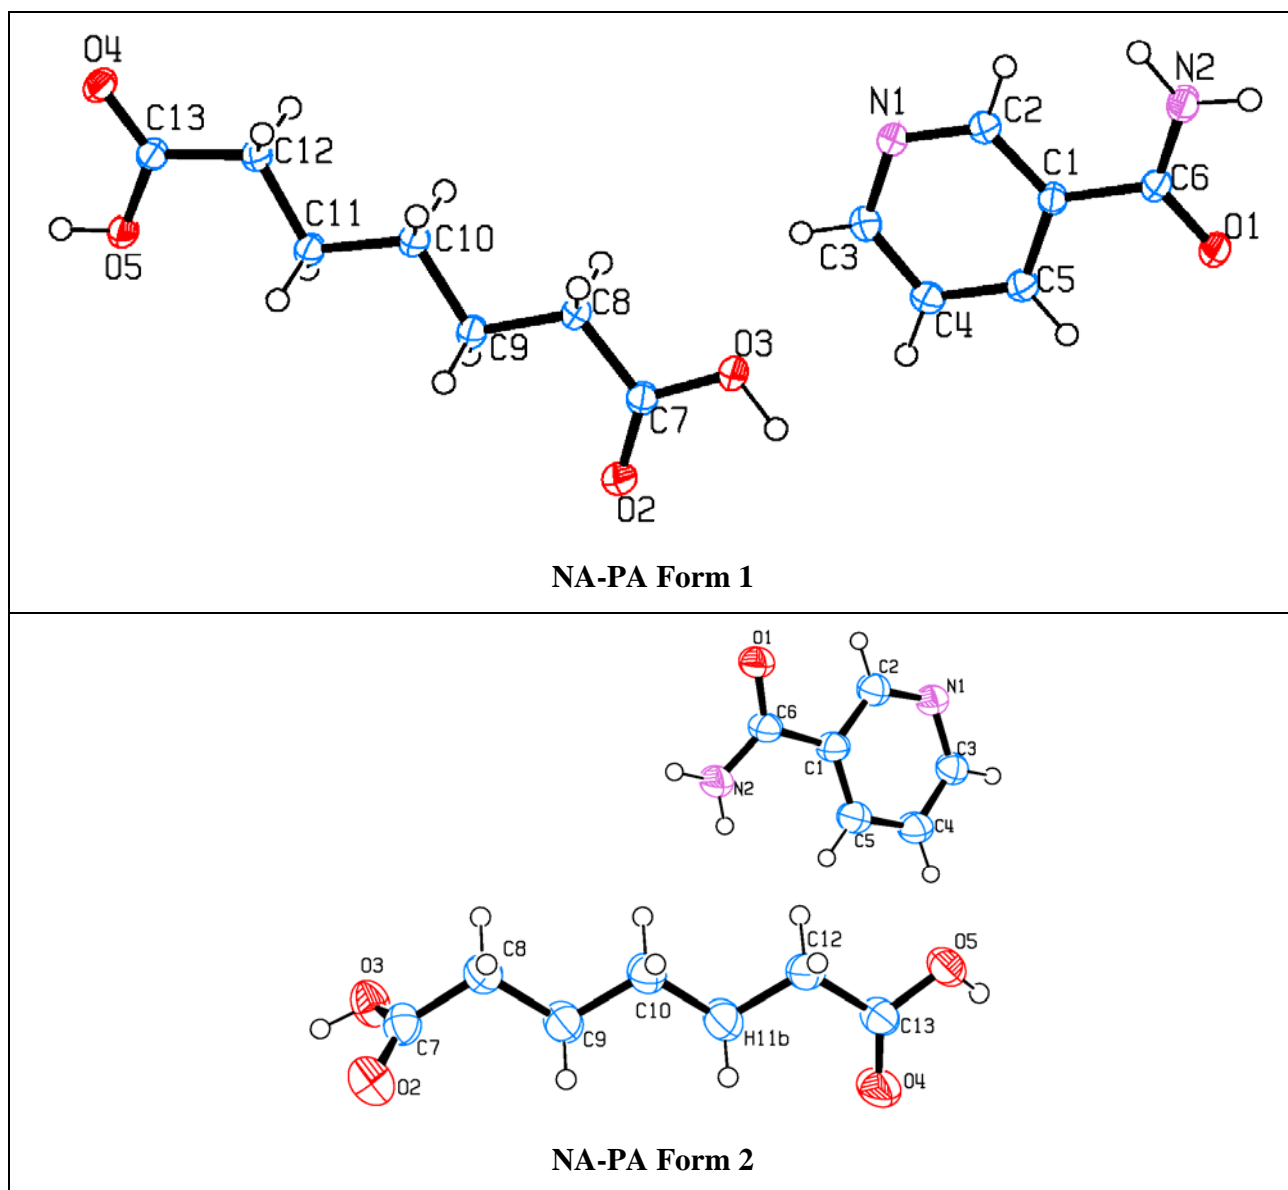

**Fig. S1** ORTEP diagrams of crystal structures of the NA-PA cocrystal polymorphs. Thermal ellipsoids are drawn at 50 % probability.

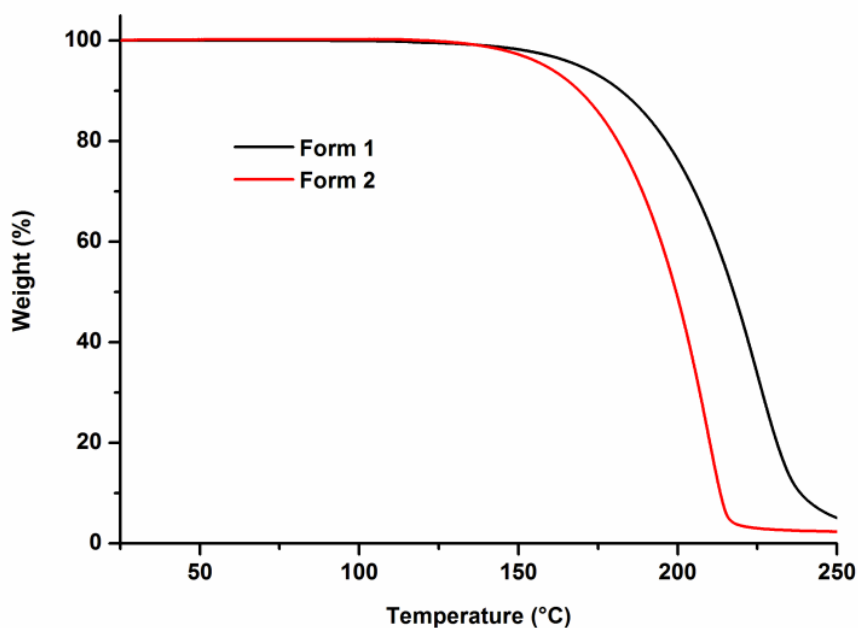

Fig. S2 TGA profiles of Form 1 and Form 2.

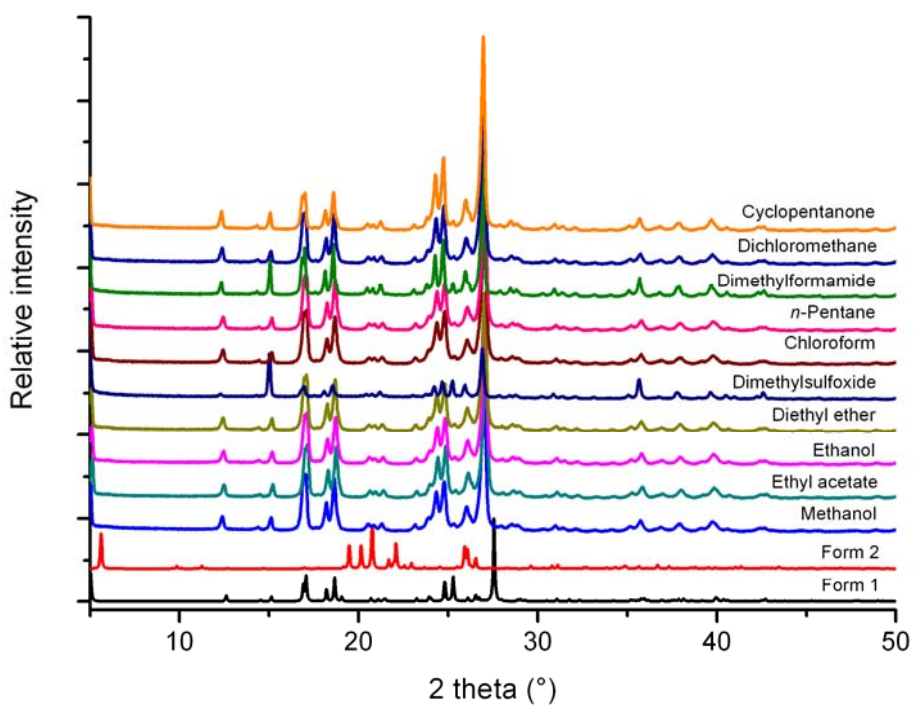

Fig. S3 Comparison of the PXRD patterns of the samples obtained in the solid-drop grinding experiments on 1:1 NA and PA. Notice that in all the experiments only Form 1 was obtained.
